# Supplementary material for: Factors shaping the choice in chemistry: insights from undergraduate students within a societal context
Source: Royal Society of Chemistry journal article supplement (doi:10.1039/d4rp00058g), 2024-01-01
Supplement: d4rp00058g1.pdf [file d4rp00058g1.pdf]

## **Factors Shaping the Choice in Chemistry: Insights from Undergraduate Students within a Societal Context**

### **Supplemental Material - Interview Protocol**

1. Tell me a little about yourself before you started studying chemistry.
2. How did your achievements lead you to choose to study chemistry at university?
3. How did people around you (family/teachers/peers) react and what did they say when you decided to study chemistry at university?
4. Did you feel that any socio-cultural message was conveyed to you regarding your choice?
5. What do you think influences the choice of studying chemistry - in high school or in higher education?
6. Why do you think students choose a career in chemistry - industry or academia?
7. What factors do you think contribute to a decline in enrollment in chemistry studies - in high school or in higher education?
8. In your opinion, why do Arab students choose chemistry as their career?
9. Did you feel ready to transition from your high school studies to university chemistry studies?
10. Looking to the future of your career, where do you see yourself after completing your studies and why?
